# Supplementary material for: Temperature-assisted rapid nucleation: a facile method to optimize the film morphology for perovskite solar cells
Source: Royal Society of Chemistry journal article supplement (doi:10.1039/c7ta06334b), 2017-01-01
Supplement: c7ta06334b1.pdf [file c7ta06334b1.pdf]

## **Temperature-assisted Rapid Nucleation: A Facile Method to Optimize the Film Morphology for Perovskite Solar Cells**

Ying-Ke Ren,<sup>a</sup> Xi-Hong Ding,<sup>a</sup> Ya-Han Wu,<sup>a</sup> Jun Zhu,<sup>\*b</sup> Tasawar Hayat,<sup>c</sup> Ahmed  
Alsaedi,<sup>c</sup> Ya-Feng Xu,<sup>d</sup> Zhao-Qian Li,<sup>d</sup> Shang-Feng Yang,<sup>e</sup> and Song-Yuan Dai<sup>\*a,c,d</sup>

*<sup>a</sup>Beijing Key Laboratory of Novel Thin-Film Solar Cells, North China Electric Power University,  
Beijing, 102206, China*

*<sup>b</sup>Key Lab of Special Display Technology, Ministry of Education, National Engineering Lab of  
Special Display Technology, State Key Lab of Advanced Display Technology, Academy of Opto-  
Electronic Technology, Hefei University of Technology, Hefei, 230009, China*

*<sup>c</sup>NAAM Research Group, Department of Mathematics, Faculty of Science, King Abdulaziz  
University, Jeddah 21589, Saudi Arabia*

*<sup>d</sup>Key Laboratory of Photovoltaic and Energy Conservation Materials, Institute of Applied  
Technology, Hefei Institutes of Physical Science, Chinese Academy of Sciences, Hefei, 230031,  
China*

*<sup>e</sup>University of Science and Technology of China, Hefei 230026, China*

\*Corresponding author.

E-mail: zhujzhu@gmail.com (J Zhu)

E-mail: sydai@ipp.ac.cn (SY Dai)

## EXPERIMENTAL SECTION

### Film Fabrication (diethyl ether)

461 mg of  $\text{PbI}_2$ , 159 mg of  $\text{CH}_3\text{NH}_3\text{I}$ , and 78 mg of DMSO (molar ratio 1:1:1) was mixed in 600 mg of DMF solution at room temperature with stirring for 1 h. The completely dissolved solution was spin-coated on the substrates at 4000 rpm for 25 s and 0.5 ml of diethyl ether was slowly dripped on the rotating substrate in 10 s before the surface changed to be turbid caused by rapid vaporization of DMF.

### Film Fabrication (chlorobenzene)

The  $(\text{FAPbI}_3)_{0.85}(\text{MAPbBr}_3)_{0.15}$  precursor solution was prepared in a glove box from a 1.35M  $\text{PbX}_2$  ( $\text{X} = \text{I}, \text{Br}$ ) in the mixed solvent of DMF and DMSO, with the molar ratios of  $\text{DMSO/DMF} = 1:4$  and  $\text{PbX}_2/\text{DMSO} = 1:1$ . The completely dissolved solution was spin-coated onto the mp- $\text{TiO}_2$  layer at 1100 rpm for 20 s and 5000 rpm for 30 s and 0.75 mL of CBZ was quickly dripped on rotating substrate in the second step (5000 rpm for 30 s).

### Solar Cell Fabrications

Fluorine-doped tin oxide (FTO) glasses (Pilkington, TEC15) were etched with 0.8 mol  $\text{L}^{-1}$  HCl aqueous and Zn powder. The etched glasses were cleaned with detergent, distilled water, ethanol and sonicated for 30 min. By means of spray pyrolysis, the blocking  $\text{TiO}_2$  layers (bl- $\text{TiO}_2$ ) were deposited on the as-prepared FTO which was followed by heating at 510°C for 30 min. The mesoporous  $\text{TiO}_2$  (mp- $\text{TiO}_2$ ) film was

deposited on cooling  $\text{TiO}_2$  by spin-coating of the  $\text{TiO}_2$  paste (Dyesol 30NR-T) following by calcining at  $510^\circ\text{C}$  for 20 min.

The transparent perovskite film was heated at  $100^\circ\text{C}$  for 20 min in order to obtain a dense film. Then, spiro-OMeTAD solution (25  $\mu\text{L}$ ), which consisted 73 mg of spiro-OMeTAD, 28  $\mu\text{L}$  of 4-tert-butyl pyridine and 17.5  $\mu\text{L}$  of lithium bis (trifluoromethanesulfonyl) imide (Li-TFSI) solution (520 mg of Li-TFSI in 1 mL of acetonitrile) in 1 mL of CBZ, was spin-coated on the perovskite film at 3000 rpm for 20 s. Finally, Au electrode with a thickness of 60 nm was deposited by using thermal evaporation under vacuum at a constant evaporation rate of  $0.6\text{ nm s}^{-1}$ .

### **Characterization**

The morphology of the perovskite film was studied by a field emission scanning electron microscope (FESEM, FEI Sirion 200, Netherland). The crystal phase was obtained with X-ray diffraction (X'Pert Pro, Netherland) using Cu  $K\alpha$  beam ( $\lambda=1.54\text{ \AA}$ ). The photocurrent density-voltage ( $J-V$ ) curves were measured under one sun illumination (AM 1.5G,  $100\text{ mW cm}^{-2}$ ) with a solar simulator (94043A, USA) equipped with Keithley 2400 source meter. When measuring, a mask with  $0.09\text{ cm}^2$  aperture area was used to avoid light scattering through the sides and define the effective area of the device. Ultraviolet-visible (UV-vis) diffuse reflectance spectroscopy and absorption spectroscopy were measured using the UV-vis spectrophotometer (SOLID3700, Shimadzu Co. Ltd, Japan). (IPCE) spectra were measured with a spectral resolution of 5 nm, using a 300 W xenon lamp and a grating monochromator equipped with order sorting filters (Newport/Oriel). The

electrochemical impedance spectra (EIS) were carried out on a computer controlled potentiostat (Autolab 320, Metrohm, Switzerland) in a frequency range of 10 mHz~1000 kHz applied in the dark. The micrographs were obtained during cooling between crossed polarizers using a microscope (DM2500P, Leica, Germany) equipped with a hot-stage (LTSE-420, Linkam, UK) and a camera (Micropublisher 5.0 RTV, Qimaging, Canada).

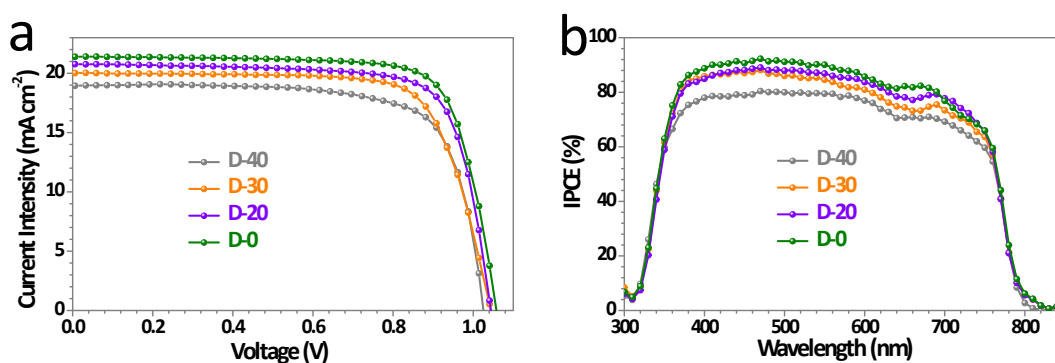

**Figure S1** (a) The current density–voltage curves of PSCs dripping with DE at different temperatures. (b) Internal photo-to-current efficiency measurement for the corresponding devices.

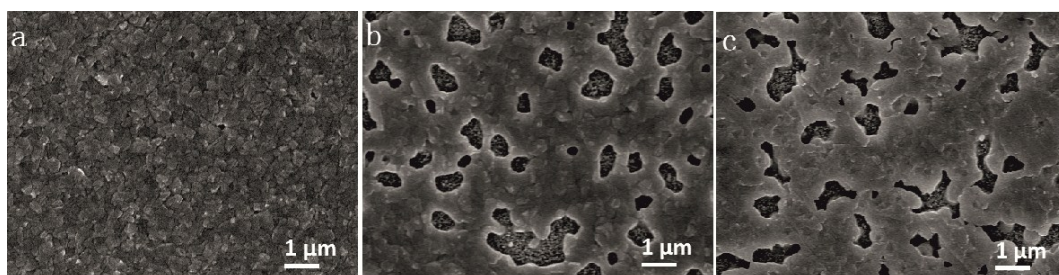

**Figure S2** Top-view SEM images of perovskite films washed with different temperature of toluene at (a) 0, (b) 15 and (c) 30 °C, respectively.

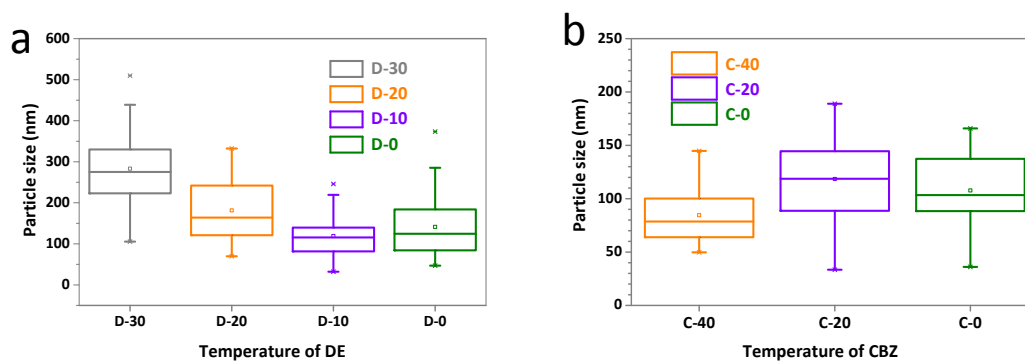

**Figure S3** The statistical distribution of the particle size for perovskite films base on (a) different temperature of DE and (b) CBZ.

**Table S1** Parameters of current density–voltage curves of PSCs dripping with DE at different temperatures.

| PSCs | $J_{sc}$              | $V_{oc}$ | FF   | PCE  | Average PCE |
|------|-----------------------|----------|------|------|-------------|
|      | (mAcm <sup>-2</sup> ) | (V)      | (%)  | (%)  | (%)         |
| D-40 | 1.03                  | 18.7     | 74.2 | 14.3 | 12.8        |
| D-30 | 1.04                  | 19.7     | 74.3 | 15.2 | 14.7        |
| D-20 | 1.04                  | 20.5     | 76.2 | 16.2 | 15.6        |
| D-0  | 1.06                  | 21.1     | 76.9 | 17.2 | 16.8        |

**Table S2** Parameters obtained by fitting the EIS

| PSCs | $R_s$ ( $\Omega$ ) | $R_{rec}$ (K $\Omega$ ) | n    |
|------|--------------------|-------------------------|------|
| C-40 | 28.5               | 3.24                    | 1.00 |
| C-20 | 36.4               | 10.4                    | 0.98 |
| C-0  | 40.9               | 17.6                    | 0.99 |
